# Supplementary material
Source: MDPI journal article supplement (https://www.mdpi.com/2071-1050/9/5/726)
Supplement: s1 [file s1]

Appendix A. Questionnaire of Rural Household Energy Consumption

No.: Survey Time:

I. Basic Information

1. Home Address: Village, Town, County (District)

2. Total Family Population: persons. Population of Permanent Residents in Family: persons.

| **Family Members** | **Gender** | **Age** | **Degree of Education** | **Vocation** | **Whether or Not Live in Home Permanently** | **Annual Income  (Agricultural Income, Non-Agricultural Income and So On)** |
| --- | --- | --- | --- | --- | --- | --- |
| Respondent |  |  |  |  |  |  |
|  |  |  |  |  |  |  |
|  |  |  |  |  |  |  |
|  |  |  |  |  |  |  |

3. Crop Situation Total cultivated area: hm2

| **Category of Crops** | **Area (hm2)** | **Yield (kg/hm2)** | **Price (yuan/kg)** | **Amount of Selling(kg)** | **Cost (yuan/hm2)** | **Purpose of Straw Use** | **Else** |
| --- | --- | --- | --- | --- | --- | --- | --- |
| Wheat |  |  |  |  |  |  |  |
| Corn |  |  |  |  |  |  |  |
| Fruit Tree |  |  |  |  |  |  |  |
|  |  |  |  |  |  |  |  |

Note: 1 Yuan RMB = 0.1451 US dollars.

II. Situation of Energy Use

4. Types and the amount of energy use for cooking, boiling water, lighting, and heating.

| **Items of Energy Use** | **Energy Types** | **Energy consumption** | | **Use Time Per Year** | **Price** | **Remark** |
| --- | --- | --- | --- | --- | --- | --- |
| **Unit: kg, m3 or KWH/day** | **Unit: kg, m3 or KWH/month** |
| Cooking | Crop straw |  |  |  |  |  |
| Corncob |  |  |  |  |  |
| Firewood |  |  |  |  |  |
| Honeycomb briquette |  |  |  |  |  |
| Coal |  |  |  |  |  |
| LPG |  |  |  |  |  |
| Biogas |  |  |  |  |  |
| Electricity |  |  |  |  |  |
| Boiling water | Straw |  |  |  |  |  |
| Corncob |  |  |  |  |  |
| Firewood |  |  |  |  |  |
| Honeycomb briquette |  |  |  |  |  |
| Coal |  |  |  |  |  |
| Electricity |  |  |  |  |  |
| Solar energy (Solar water heater) |  |  |  |  |  |

| **Items of Energy Use** | | **Number and Power** | **Electric Charge (yuan/month)** | **Remark** |
| --- | --- | --- | --- | --- |
| Lighting | Electric light |  |  |  |
|  |  |  |  |
| Household appliances | Television |  |  |  |
| Washing machine |  |  |  |
| Refrigerator |  |  |  |
| Air conditioner |  |  |  |
|  |  |  |  |

| **Items Of Energy Use** | | **Energy Types and the Amount of Energy Consumption (kg or KWH/day)** | | **Number of the Bed, Stove or Appliances** | **Heating Time** | **Fuel Sources** |
| --- | --- | --- | --- | --- | --- | --- |
| Heating | Heatable brick bed (Whether it is connected with the kitchen.) | Crop straw |  |  |  |  |
| Firewood |  |  |  |  |
| Corncob |  |  |  |  |
| Coal |  |  |  |  |
| Stove | Coal |  |  |  |  |
| Firewood |  |  |  |  |
| Corncob |  |  |  |  |
| Honeycomb briquette |  |  |  |  |
| Electric appliances | Electricity |  |  |  |  |

5. Type and cost of cookers or appliances (unit: yuan)

A. A traditional pot B. Gas cooker C. Coal stove D. Induction cooker

E. Solar cooker F. Microwave oven G. Solar water heater H. Electric cooker

I. Electric baking pan J. Else

6. The reason with or without biogas:

7. The reason with or without solar energy:

8. Winter heating season: months. Heating area: m2.

III. Village information

9. The whole village: households and people; Longitude and latitude: ;

Elevation: m; Family with biogas: households.
